# Supplementary material
Source: PubMed Central journal article supplement (PMC10691881)
Supplement: NIHMS1935888-supplement-Appendix.pdf [file NIHMS1935888-supplement-Appendix.pdf]

## SUPPLEMENTAL APPENDIX

### Author Relationships With Industry and Other Entities (Comprehensive)— 2022 ACC Expert Consensus Decision Pathway on the Evaluation and Disposition of Acute Chest Pain in the Emergency Department

| Committee Member                         | Employment                                                                                                                                                                        | Consultant                                                                   | Speakers Bureau | Ownership/<br>Partnership/<br>Principal | Personal Research                                                                                                                                                                                                                                                                                                                                                              | Institutional,<br>Organizational, or<br>Other Financial<br>Benefit                                                         | Expert Witness |
|------------------------------------------|-----------------------------------------------------------------------------------------------------------------------------------------------------------------------------------|------------------------------------------------------------------------------|-----------------|-----------------------------------------|--------------------------------------------------------------------------------------------------------------------------------------------------------------------------------------------------------------------------------------------------------------------------------------------------------------------------------------------------------------------------------|----------------------------------------------------------------------------------------------------------------------------|----------------|
| Michael C. Kontos<br><i>(Chair)</i>      | Virginia Commonwealth University Department of Internal Medicine Division of Cardiology—Professor, Medical Director, Coronary Intensive Care Unit; Co-Director, Chest Pain Center | None                                                                         | None            | None                                    | None                                                                                                                                                                                                                                                                                                                                                                           | <ul style="list-style-type: none"> <li>• ACC</li> <li>• SAEM</li> <li>• NIH‡</li> <li>• VCSQI†</li> <li>• VHAC†</li> </ul> | None           |
| James A. de Lemos<br><i>(Vice-Chair)</i> | UT Southwestern Medical School—Professor of Medicine; Kern Wildenthal MD, PhD Distinguished Chair in Cardiology                                                                   | <ul style="list-style-type: none"> <li>• AskBio</li> <li>• Quidel</li> </ul> | None            | None                                    | <ul style="list-style-type: none"> <li>• Abbott Diagnostics*</li> <li>• Amgen</li> <li>• Astra Zeneca (DSMB)</li> <li>• Beckman Coulter*</li> <li>• Eli Lilly and Company (DSMB)*</li> <li>• Novo Nordisk (DSMB)*</li> <li>• Regeneron (DSMB)</li> <li>• Roche Diagnostics*</li> <li>• Siemens Health Care Diagnostics (DSMB)*</li> <li>• Verve Therapeutics (DSMB)</li> </ul> | None                                                                                                                       | None           |
| Steven B. Deitelzweig                    | Ochsner Health System—Chairman for Hospital Medicine                                                                                                                              | <ul style="list-style-type: none"> <li>• Pfizer*</li> </ul>                  | None            | None                                    | <ul style="list-style-type: none"> <li>• Alexion</li> <li>• Bristol Myers Squibb*</li> </ul>                                                                                                                                                                                                                                                                                   | None                                                                                                                       | None           |
| Deborah B. Diercks                       | UT Southwestern Medical School—Professor and Chair of Emergency Medicine                                                                                                          | <ul style="list-style-type: none"> <li>• ETHhealthcare</li> </ul>            | None            | None                                    | <ul style="list-style-type: none"> <li>• Abbott Laboratories*</li> <li>• Bristol Myers Squib†</li> <li>• Echosens†</li> </ul>                                                                                                                                                                                                                                                  | <ul style="list-style-type: none"> <li>• ACC†</li> <li>• Emergencies in Medicine†</li> </ul>                               | None           |

| Committee Member | Employment                                                                                                                                                                    | Consultant                                                                                        | Speakers Bureau | Ownership/<br>Partnership/<br>Principal | Personal Research                                                                                                                            | Institutional,<br>Organizational, or<br>Other Financial<br>Benefit                           | Expert Witness |
|------------------|-------------------------------------------------------------------------------------------------------------------------------------------------------------------------------|---------------------------------------------------------------------------------------------------|-----------------|-----------------------------------------|----------------------------------------------------------------------------------------------------------------------------------------------|----------------------------------------------------------------------------------------------|----------------|
|                  |                                                                                                                                                                               |                                                                                                   |                 |                                         | <ul style="list-style-type: none"> <li>• Ortho Clinical†</li> <li>• Quidel</li> <li>• Roche*</li> <li>• Siemens</li> <li>• Stago†</li> </ul> | <ul style="list-style-type: none"> <li>• SAEM†</li> </ul>                                    |                |
| M. Odette Gore   | Department of Medicine, Division of Cardiology, the University of Colorado Anschutz Medical Campus and Denver Health and Hospital Authority – Assistant Professor of Medicine | None                                                                                              | None            | None                                    | None                                                                                                                                         | None                                                                                         | None           |
| Erik P. Hess     | Vanderbilt University Medical Center— Professor and Chair, Department of Emergency Medicine                                                                                   | None                                                                                              | None            | None                                    | <ul style="list-style-type: none"> <li>• Patient Centered Outcomes Research Institute†</li> </ul>                                            | None                                                                                         | None           |
| Cian P. McCarthy | Massachusetts General Hospital – Cardiology Fellow                                                                                                                            | None                                                                                              | None            | None                                    | None                                                                                                                                         | None                                                                                         | None           |
| James K. McCord  | Henry Ford Hospital Heart and Vascular Institute—Associate Professor of Medicine                                                                                              | <ul style="list-style-type: none"> <li>• Beckman</li> <li>• Roche*</li> <li>• Siemens*</li> </ul> | None            | None                                    | <ul style="list-style-type: none"> <li>• Abbott*</li> <li>• Beckman Diagnostics*</li> <li>• Roche*</li> <li>• Siemens*</li> </ul>            | <ul style="list-style-type: none"> <li>• ACC Accreditation Services Board Member†</li> </ul> | None           |
| Paul I. Musey Jr | Indiana University School of Medicine— Associate Professor of Emergency Medicine                                                                                              | None                                                                                              | None            | None                                    | None                                                                                                                                         | <ul style="list-style-type: none"> <li>• SAEM</li> </ul>                                     | None           |
| Leesa J. Wright  | Methodist University Hospital— Cardiovascular Institute Outreach Coordinator                                                                                                  | None                                                                                              | None            | None                                    | None                                                                                                                                         | None                                                                                         | None           |
| Todd C. Villines | University of Virginia—Julian Ruffin Beckwith Distinguished Professor of Medicine, Division of Cardiovascular Medicine                                                        | None                                                                                              | None            | None                                    | None                                                                                                                                         | None                                                                                         | None           |

This table represents all relationships of committee members with industry and other entities that were reported by authors, including those not deemed to be relevant to this document, at the time this document was under development. The table does not necessarily reflect relationships with industry at the time of publication. A person is deemed to have a significant interest in a business if the interest represents ownership of ≥5% of the voting stock or share of the business entity, or ownership of ≥\$5,000 of the fair market value of the business entity, or if funds received by the person from the business entity exceed 5% of the person’s

gross income for the previous year. Relationships that exist with no financial benefit are also included for the purpose of transparency. Relationships in this table are modest unless otherwise noted. Please refer to <http://www.acc.org/guidelines/about-guidelines-and-clinical-documents/relationships-with-industry-policy> for definitions of disclosure categories or additional information about the ACC/AHA Disclosure Policy for Writing Committees.

\*Significant relationship.

†No financial benefit.

‡ Relationship with this company is limited to enrolling patients in clinical trials. This disclosure was entered under the Clinical Trial Enroller category in the ACC's disclosure system. To appear in this category, the author acknowledges that there is no direct or institutional relationship with the trial sponsor as defined in the ACC/AHA Disclosure Policy for Writing Committees.

ACC = American College of Cardiology; CTSN = Cardiothoracic Surgical Trials Network; DSMB = Data Management Safety Board; JAMA = Journal of the American Medical Association; NHLBI = National Heart, Lung, and Blood Institute; NIH = National Institutes of Health; SAEM = Society of Academic Emergency Medicine; VCSQI = Virginia Cardiac Services Quality Initiative VHAC = Veterans' Health Advisory Council

**Table A. Current U.S. Food and Drug Administration–Approved High-Sensitivity Cardiac Troponin I and T Assay Analytical Characteristics Designated by Manufacturer\***

| Assay                                                       | LoD (ng/L)                             | LoQ (ng/L) <sup>†</sup> | 99 <sup>th</sup> Percentile (ng/L)                                         | % CV at 99 <sup>th</sup> Percentile ‡ | FDA Substantial Equivalence (510k) Decision # |
|-------------------------------------------------------------|----------------------------------------|-------------------------|----------------------------------------------------------------------------|---------------------------------------|-----------------------------------------------|
| Abbott ARCHITECT STAT hsc-TnI                               | 2                                      | 4                       | Overall: 28<br>F: 17<br>M: 35                                              | <5.0%                                 | K191595                                       |
| Beckman Coulter Access hs-cTnI (UniCel DxI Access platform) | 3                                      | 3                       | Overall: 18<br>F: 15 (plasma);<br>14 (serum)<br>M: 20                      | <6.5%                                 | K172783                                       |
| Beckman Coulter Access hs-cTnI (Access 2 platform)          | 2                                      | 3                       | Overall: 18<br>F: 12<br>M: 20                                              | <6.9%                                 | K172787                                       |
| Roche Elecsys Troponin T Gen 5 STAT                         | 3 to 5 (depending on type of analyzer) | 6                       | Overall: 19<br>F: 14<br>M: 22                                              | <10%                                  | K162895                                       |
| Siemens ADVIA Centaur High-Sensitivity TnI                  | 2                                      | 3                       | Overall: 47<br>F: 37 (plasma);<br>40 (serum)<br>M: 57 (plasma); 58 (serum) | <4.9%                                 | K171274                                       |
| Siemens ATELLICA High-Sensitivity TnI                       | 2                                      | 3                       | Overall: 45<br>F: 34 (plasma);<br>39 (serum)<br>M: 53 (plasma); 54 (serum) | <4.0%                                 | K171566                                       |

|                                              |   |   |                               |       |         |
|----------------------------------------------|---|---|-------------------------------|-------|---------|
| Siemens Dimension VISTA High-Sensitivity TnI | 2 | 3 | Overall: 59<br>F: 54<br>M: 79 | <5.0% | K182225 |
| Siemens Dimension ExL High-Sensitivity TnI   | 3 | 4 | Overall: 60<br>F: 51<br>M: 76 | <5.0% | K190676 |

\*Values are extracted from documentation provided by manufacturers to the FDA, except where otherwise noted. All decimal values for LoD and LoQ concentrations are rounded up to the next-highest integer; 99<sup>th</sup> percentile values are rounded up or down to the nearest integer.

†The concentration at 20% CV (also referred to as LoQ 20% CV, or simply LoQ in the United States) is the lowest concentration that can be reported numerically in U.S. clinical practice, as per FDA regulations.

‡Data from the International Federation of Clinical Chemistry and Laboratory Medicine (IFCC) Committee on Clinical Applications of Cardiac Bio-Markers v092021 table, available at <https://www.ifcc.org/media/479205/high-sensitivity-cardiac-troponin-i-and-t-assay-analytical-characteristics-designated-by-manufacturer-v092021-3.pdf>.

CV = coefficient of variation; F = female; FDA = Food and Drug Administration; hs-cTnI = high sensitivity cardiac troponin I; LoD = limit of detection; LoQ = limit of quantification; M = male

**Figure A. Summary of Analytic Definitions**

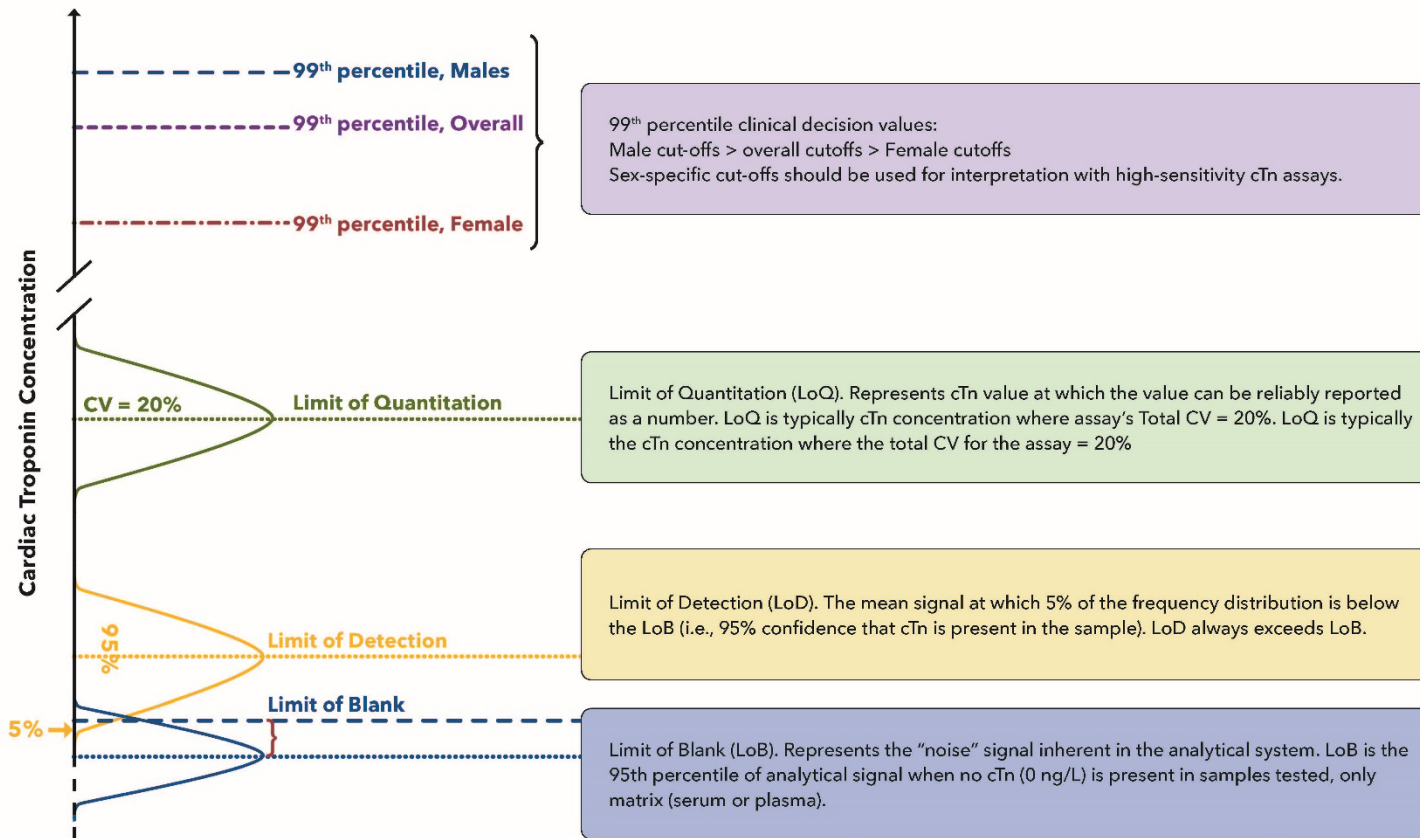

Modified with permission from Januzzi JL Jr, Mahler SA, Christenson RH, Rymer J, Newby LK, Body R, Morrow DA, Jaffe AS. Recommendations for institutions transitioning to high-sensitivity troponin testing: JACC Scientific Expert Panel. *J Am Coll Cardiol.* 2019 Mar 12;73(9):1059-1077.

cTn = cardiac troponin; CV = coefficient of variation; LoB = limit of blank; LoD = limit of detection; LoQ = limit of quantitation

**Figure B. Modified European Society of Cardiology 0/2-Hour CDPs for Ruling Out MI**

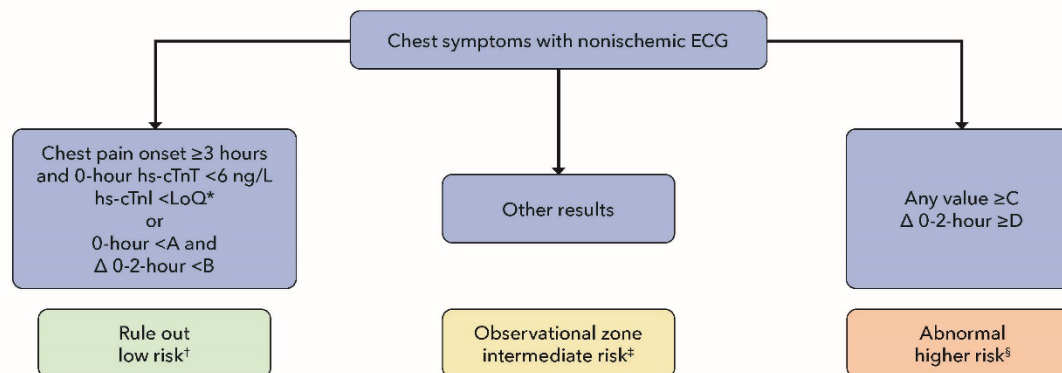

| Assay                          | LoQ* | A  | B | C   | D  |
|--------------------------------|------|----|---|-----|----|
| Roche Elecys hs-cTnT           | 6    | 14 | 4 | 52  | 10 |
| Abbott Architect hs-cTnI       | 4    | 6  | 2 | 64  | 15 |
| Beckman Coulter Access hs-cTnI | 3    | 5  | 5 | 50  | 20 |
| Siemens ADVIA Centaur hs-cTnI  | 3    | 8  | 7 | 120 | 12 |

Note that many variations of these rapid CDPs have been implemented in different centers, and modification of the algorithms shown may be considered based on local considerations

\* The LoQ may differ slightly from 0-hour rule-out thresholds tested in individual studies. Using a cutoff of <5 ng/L can also be considered instead of the LoQ for the 0-hour rule-out threshold for hs-cTnI assays.

† See sections 5.6 and 5.8 for recommendations on follow-up and testing.

‡ Additional evaluation should include at least additional observation with hs-cTn measurement at 6 hours, with classification of myocardial injury as described in section 8 on chronic myocardial injury, acute myocardial injury, type 1 myocardial infarction (MI) and type 2 MI, as per the Universal Definition of Myocardial Infarction.

§Patients with acute MI should be managed according to standard practice guidelines.

CDP = clinical decision pathway; ECG = electrocardiogram; hs-cTnI= high-sensitivity cardiac troponin I; hs-cTnT = high-sensitivity cardiac troponin T; MI = myocardial infarction

**References:** Boeddinghaus J, Twerenbold R, Nestelberger T, Badertscher P, Wildi K, Puelacher C, du Fay de Lavallaz J, Keser E, Rubini Giménez M, Wussler D, Kozhuharov N, Rentsch K, Miró Ò, Martín-Sánchez FJ, Morawiec B, Stefanelli S, Geigy N, Keller DI, Reichlin T, Mueller C; APACE Investigators. Clinical validation of a novel high-sensitivity cardiac troponin I assay for early diagnosis of acute myocardial infarction. *Clin Chem*. 2018 Sep;64(9):1347-1360.

Nestelberger T, Boeddinghaus J, Greenslade J, Parsonage WA, Than M, Wussler D, Lopez-Ayala P, Zimmermann T, Meier M, Troester V, Badertscher P, Koechlin L, Wildi K, Anwar M, Freese M, Keller DI, Reichlin T, Twerenbold R, Cullen L, Mueller C; APACE and ADAPT Investigators. Two-hour algorithm for rapid triage of suspected acute myocardial infarction using a high-sensitivity cardiac troponin I assay. *Clin Chem*. 2019 Nov;65(11):1437-1447.

Nowak RM, Christenson RH, Jacobsen G, McCord J, Apple FS, Singer AJ, Limkakeng A Jr, Peacock WF, deFilippi CR. Performance of novel high-sensitivity cardiac troponin I assays for 0/1-hour and 0/2-to 3-hour evaluations for acute myocardial infarction: Results from the HIGH-US study. *Ann Emerg Med*. 2020 Jul;76(1):1-13.

Peacock WF, Christenson R, Diercks DB, Fromm C, Headden GF, Hogan CJ, Kulstad EB, LoVecchio F, Nowak RM, Schrock JW, Singer AJ, Storrow AB, Straseski J, Wu AHB, Zelinski DP. Myocardial infarction can be safely excluded by high-sensitivity troponin I testing 3 hours after emergency department presentation. *Acad Emerg Med*. 2020 Aug;27(8):671-680.

Sandoval Y, Nowak R, deFilippi CR, Christenson RH, Peacock WF, McCord J, Limkakeng AT, Sexter A, Apple FS. Myocardial infarction risk stratification with a single measurement of high-sensitivity troponin I. *J Am Coll Cardiol*. 2019 Jul 23;74(3):271-282.

Shah AS, Anand A, Sandoval Y, Lee KK, Smith SW, Adamson PD, Chapman AR, Langdon T, Sandeman D, Vaswani A, Strachan FE, Ferry A, Stirzaker AG, Reid A, Gray AJ, Collinson PO, McAllister DA, Apple FS, Newby DE, Mills NL; High-STEACS investigators. High-sensitivity cardiac troponin I at presentation in patients with suspected acute coronary syndrome: a cohort study. *Lancet*. 2015 Dec 19;386(10012):2481-8.

Twerenbold R, Badertscher P, Boeddinghaus J, Nestelberger T, Wildi K, Rubini Gimenez M, Miró Ò, Martín-Sánchez FJ, Reichlin T, Mueller C. Effect of the FDA regulatory approach on the 0/1-h algorithm for rapid diagnosis of MI. *J Am Coll Cardiol*. 2017 Sep 19;70(12):1532-1534.

Wildi K, Nestelberger T, Wussler D, Boeddinghaus J, Badertscher P, Koechlin L, Duwe P, Rubini Gimenez M, Twerenbold R, Mueller C. Impact of Food and Drug Administration regulatory approach on the 0/2-Hour algorithm for rapid triage of suspected myocardial infarction. *Circ Cardiovasc Qual Outcomes*. 2019 Jan;12(1):e005188.



**Table B. Subtypes of Myocardial Infarction**

| Type   |   | Definition                                                                                                                                                                                                   |
|--------|---|--------------------------------------------------------------------------------------------------------------------------------------------------------------------------------------------------------------|
| Type 1 |   | A myocardial infarction precipitated by plaque disruption (rupture erosion) in the presence of atherosclerotic coronary artery disease                                                                       |
| Type 2 |   | A myocardial infarction occurring in the setting of an imbalance between myocardial oxygen supply and demand and unrelated to acute coronary atherothrombosis                                                |
| Type 3 |   | Sudden cardiac death presumed secondary to myocardial infarction due to the presence of preceding symptoms suggestive of ischemia or proven myocardial infarction detected on subsequent autopsy examination |
| Type 4 | a | A percutaneous coronary intervention–related myocardial infarction occurring within 48 hours of the index procedure                                                                                          |
|        | b | A myocardial infarction due to stent/scaffold thrombosis associated with percutaneous coronary intervention                                                                                                  |
|        | c | A myocardial infarction due to in-stent restenosis associated with percutaneous coronary intervention                                                                                                        |
| Type 5 |   | A myocardial infarction associated with coronary artery bypass grafting                                                                                                                                      |
